# Supplementary material for: A novel molecularly imprinted quartz crystal microbalance sensor for fenamiphos determination based on boron-sulphur co-doped ultra-thin graphitic carbon nitride-incorporated Cu-MOFs
Source: Royal Society of Chemistry journal article supplement (doi:10.1039/d5ay02149a), 2026-01-01
Supplement: d5ay02149a1.pdf [file d5ay02149a1.pdf]

## Supplementary Data

For

**A novel molecular imprinted quartz crystal microbalance sensor for fenamiphos  
determination based on boron-sulphur co-doping ultra-thin graphitic carbon nitride  
incorporated Cu-MOF**

Şule Yıldırım Akıcı<sup>a</sup>, Ahmet Düzel<sup>b</sup>, Ülkü Melike Alptekin<sup>c</sup>, Sena Bekerecioğlu<sup>a</sup>, İlknur Polat<sup>a</sup>, Necip Atar<sup>d</sup>, Mehmet Lütfi Yola<sup>e,f\*</sup>

<sup>a</sup>*Department of Nutrition and Dietetics, Faculty of Health Sciences, Hasan Kalyoncu University, Gaziantep, 27010, Türkiye*

<sup>b</sup>*Department of Environmental Engineering, Faculty of Engineering and Architecture, Sinop University, Sinop, 57000, Türkiye*

<sup>c</sup>*Department of Medical Services and Techniques, Dörtüol Vocational School of Health Services, Iskenderun Technical University, Hatay, 31200, Türkiye*

<sup>d</sup>*Department of Chemical Engineering, Faculty of Engineering, Pamukkale University, Denizli, 20160, Türkiye*

<sup>e</sup>*Department of Biology, Faculty of Science, Ankara University, Ankara, 06100, Türkiye*

<sup>f</sup>*Integrated Technologies Research Center (BUTAM), Ankara University, Ankara, 06690, Türkiye*

*\*Correspondence: mehmetlutfiyola@ankara.edu.tr; Tel.: +90-3122168600; Fax: +90-3122868900*

## 2.2. Instrumentation

Scanning electron microscopy (SEM, ZEISS EVO 50 SEM, Tokyo, Japan), BELSORP-mini II instrument at liquid nitrogen temperature for N<sub>2</sub> adsorption isotherms (China), Fourier Transform Infrared Spectroscopy (FTIR, Bruker Optics Inc., Ettlingen, Germany) and Rigaku X-ray diffractometer (XRD, Germany) were used for the structural characterizations. Nano magnetics instrument mode atomic force microscopy (AFM, Tokyo, Japan) was used for the observation of surface thicknesses and INFICON Acquires Maxtek QCM system was utilized for analytical applications. QCM chips had a fundamental frequency of 20 MHz with a small size below 5×5 mm<sup>2</sup>. For GC-MS method, QP 5000 Shimadzu equipped with capillary column, 15m×0.25 mm×0.5 μm, containing 50% cyanopropylphenyl-methylpolysiloxane was used at 200 °C and Helium was used as the carrier gas at 96.5 KPa. The splitless mode was used for injection of 1 μL volume, with the valve opened for 30 s.

## 3.4. Sensitivity of MIP/BS-g-C<sub>3</sub>N<sub>4</sub>-CuMOF/QCM

$$LOQ = 10.0 S / m$$

$$LOD = 3.3 S / m$$

S: Standard deviation of the intercept and m: Slope of the regression line

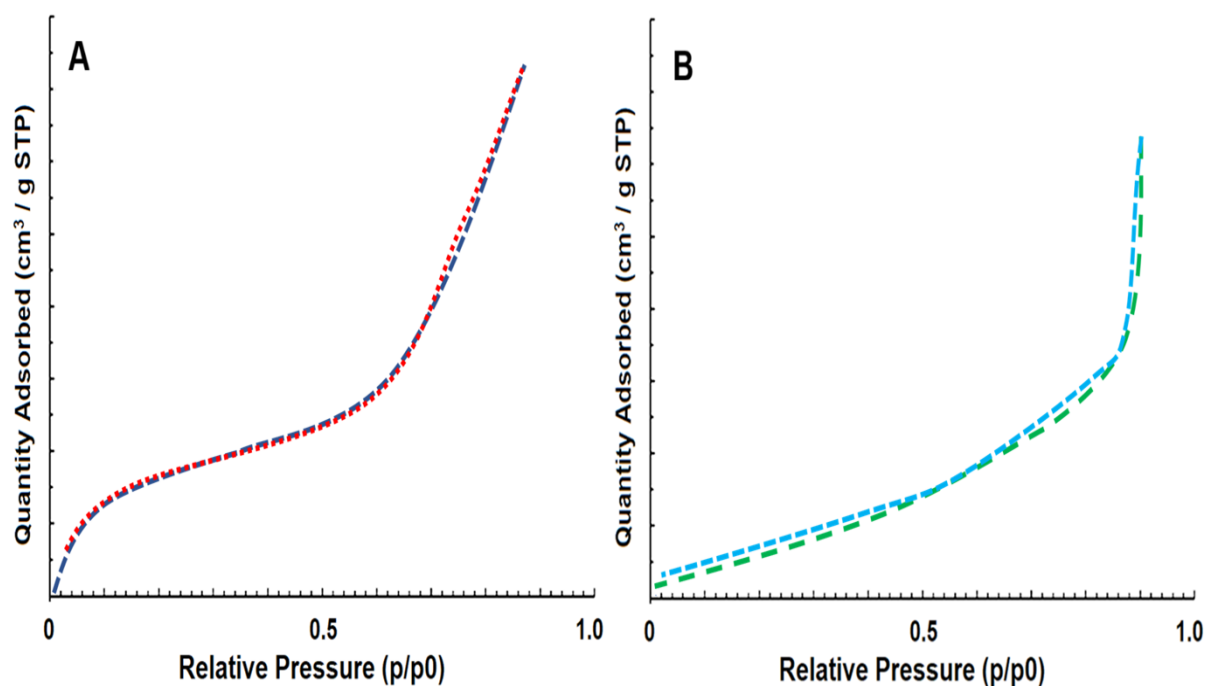

**Fig. S1.** BET curves of (A) BS-g-C<sub>3</sub>N<sub>4</sub> and (B) BS-g-C<sub>3</sub>N<sub>4</sub>-CuMOF nanocomposite

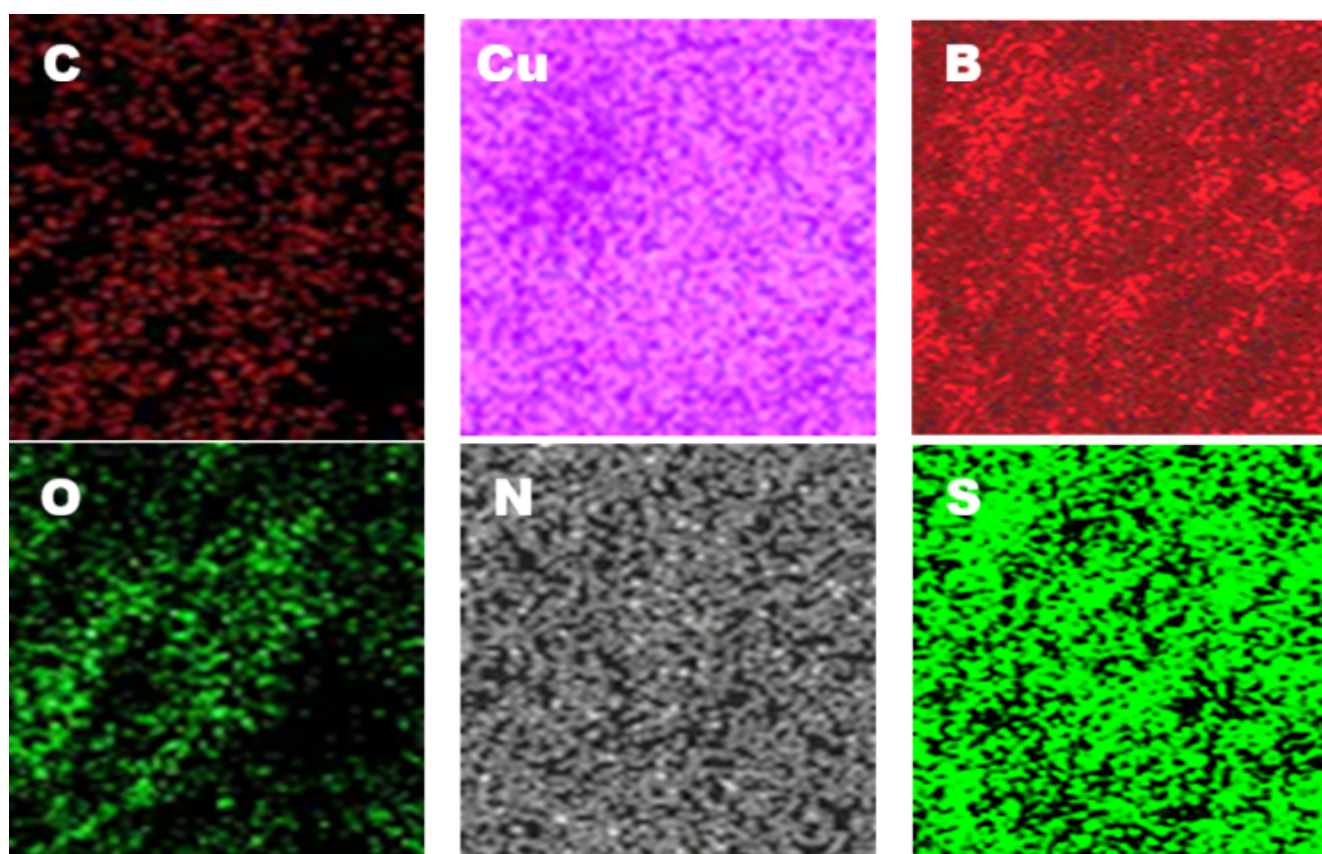

**Fig. S2.** EDX MAPs spectrum of BS-g-C<sub>3</sub>N<sub>4</sub>-CuMOF nanocomposite

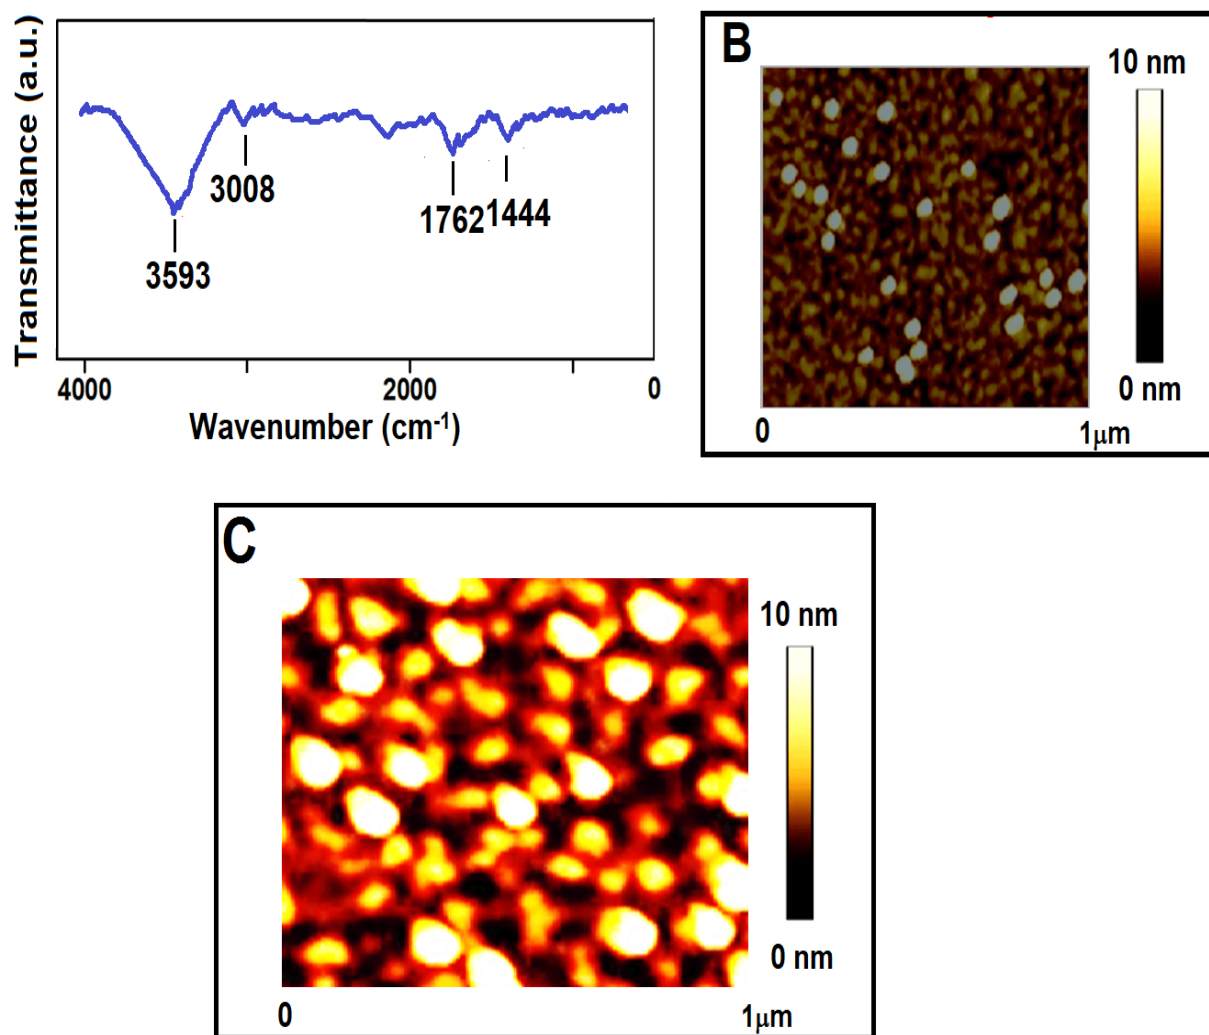

**Fig. S3.** (A) FTIR spectra of FEN-imprinted film on BS-g-C<sub>3</sub>N<sub>4</sub>-CuMOF/QCM with FEN removal; AFM images of (B) bare QCM chip and (C) FEN-imprinted film on BS-g-C<sub>3</sub>N<sub>4</sub>-CuMOF/QCM with FEN removal

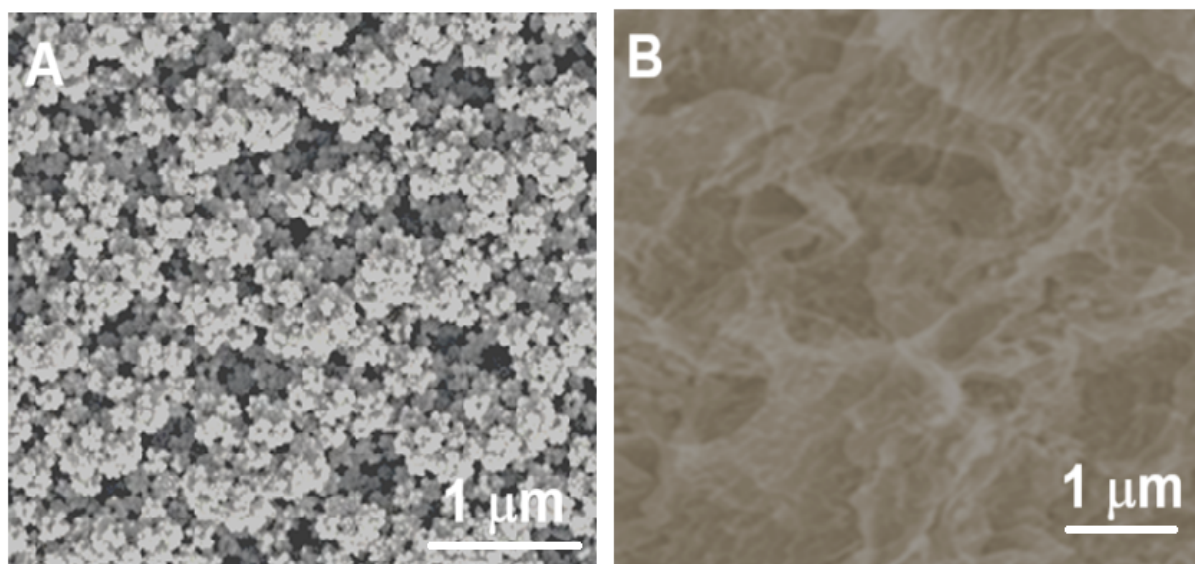

**Fig. S4.** SEM image of (A) MIP/BS-g-C<sub>3</sub>N<sub>4</sub>-CuMOF/QCM with FEN removal and (B) NIP/BS-g-C<sub>3</sub>N<sub>4</sub>-CuMOF/QCM

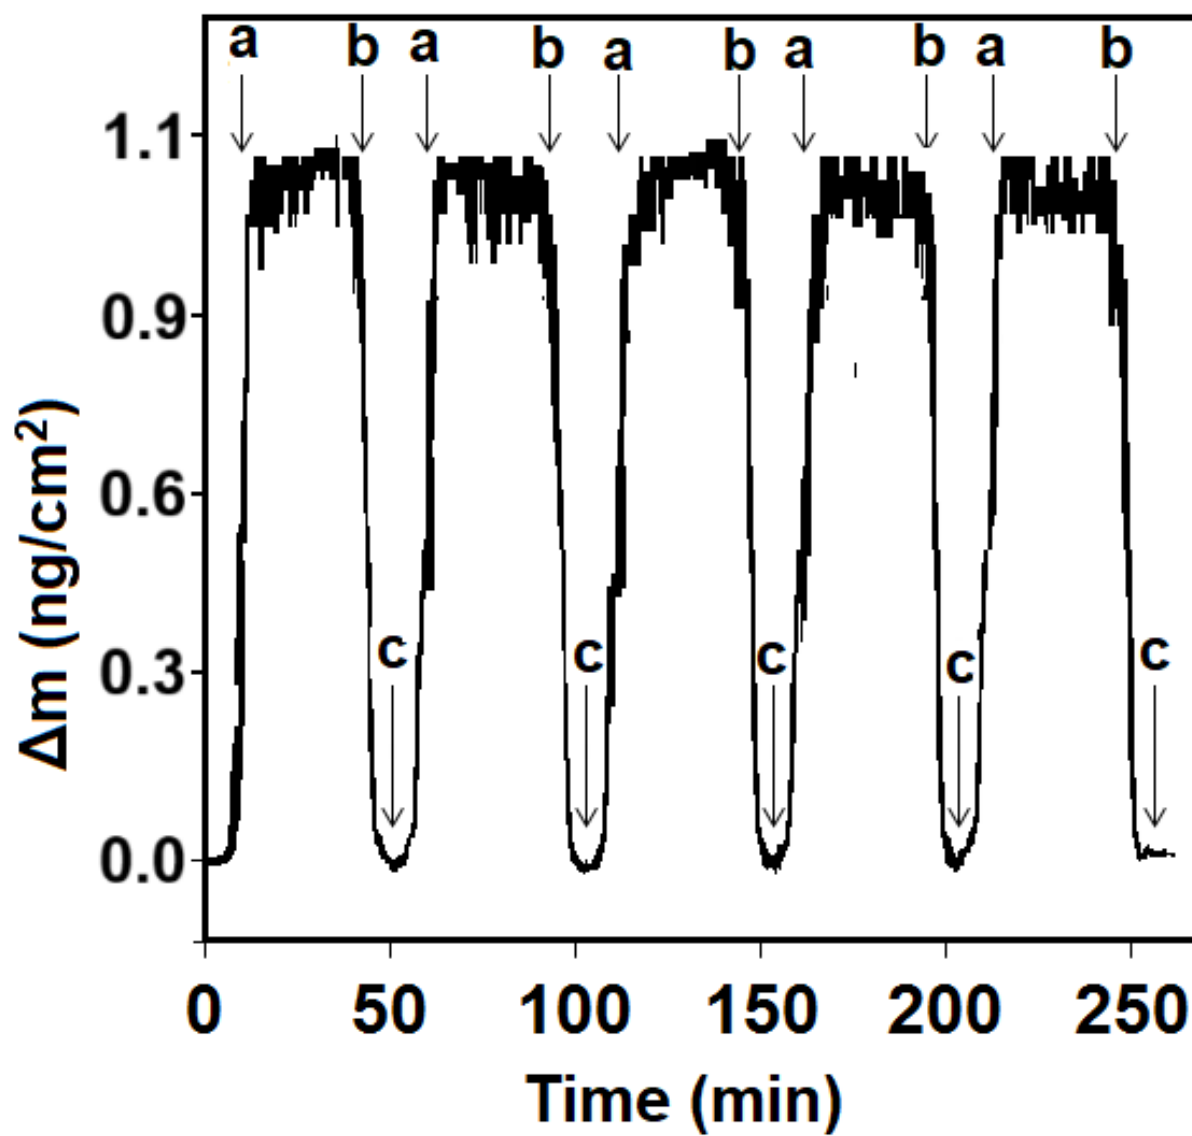

**Fig. S5.** Repeatability of a MIP/BS-g-C<sub>3</sub>N<sub>4</sub>-CuMOF/QCM chip: (a) adsorption; (b) desorption; (c) regeneration

**Table S1.** k and k' values of MIP/BS-g-C<sub>3</sub>N<sub>4</sub>-CuMOF/QCM and NIP/BS-g-C<sub>3</sub>N<sub>4</sub>-CuMOF/QCM (*n*=6)

|     | MIP                              |        | NIP                              |      |       |
|-----|----------------------------------|--------|----------------------------------|------|-------|
|     | $\Delta m$ (ng/cm <sup>2</sup> ) | k      | $\Delta m$ (ng/cm <sup>2</sup> ) | k    | k'    |
| FEN | 1.10 ± 0.01                      | -      | 0.015 ± 0.001                    | -    | -     |
| ISO | 0.15 ± 0.02                      | 7.33   | 0.010 ± 0.001                    | 1.50 | 4.89  |
| COU | 0.10 ± 0.02                      | 11.00  | 0.008 ± 0.003                    | 1.88 | 5.85  |
| DIA | 0.04 ± 0.01                      | 27.50  | 0.005 ± 0.002                    | 3.00 | 9.17  |
| CBZ | 0.01 ± 0.03                      | 110.00 | 0.002 ± 0.001                    | 7.50 | 14.67 |

Analyte concentrations: 5.0 nmol/L FEN, 1000.0 nmol/L ISO, 1000.0 nmol/L COU, 1000.0 nmol/L DIA and 1000.0 nmol/L CBZ
